# Supplementary material
Source: PubMed Central journal article supplement (PMC2666593)
Supplement: M809617200_1.pdf [file M809617200_1.pdf]

## SUPPLEMENTAL FIGURE LEGENDS

Fig. S1. Cooperative nucleosome acetylation by the Ada2/Ada3/Gcn5 subcomplex requires the Gcn5 bromodomain. Initial velocity of nucleosomal array acetylation per enzyme as a function of nucleosome concentration for Ada2/Ada3/Gcn5 (solid circles) and Ada2/Ada3/Gcn5-Y413A subcomplex (open circles). The data shown is the same as that shown in Figure 1B, but includes nucleosome concentrations greater than 400 nM nucleosome.

Fig. S2. H4K16 acetylation promotes mononucleosome acetylation in a bromodomain-dependent manner. Comparison of the initial velocity of mononucleosome acetylation per enzyme activity for wild-type (left) and Gcn5-Y413A (right) SAGA complex on 300 nM mononucleosomes containing either H4K16 acetylated octamer (white bars) or wild-type octamer (dark bars).

Fig. S3. Ratio of acetylation for H4K16 pre-acetylated nucleosomal arrays to non-preacetylated nucleosome arrays for the four major H3 acetylation sites, K9, K14, K18, and K23. Ratios were calculated with the data from Figure 1D.

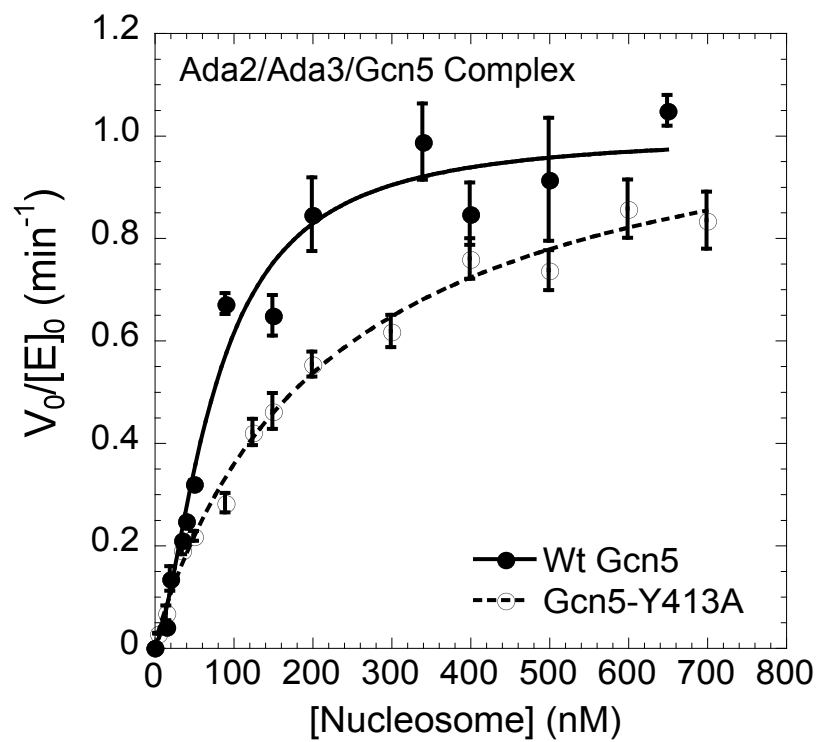

Figure S1

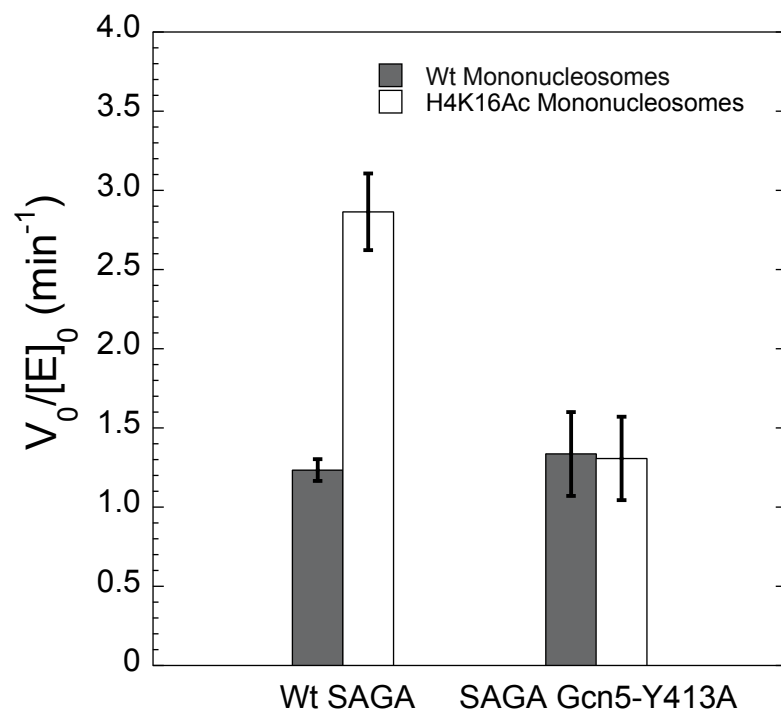

Figure S2

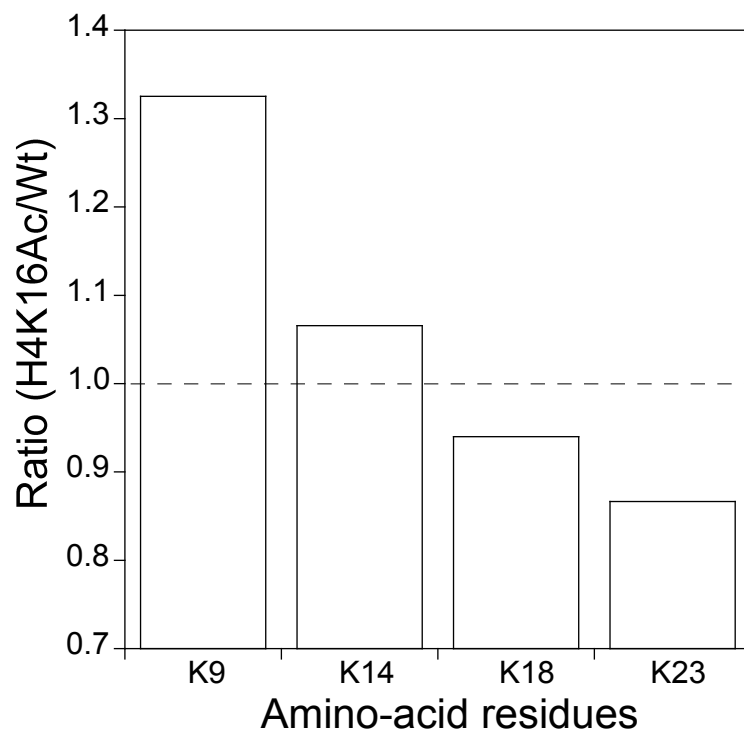

Figure S3
